# Supplementary material for: Discovery of SARS-CoV-2 3CLPro Peptidomimetic Inhibitors through the Catalytic Dyad Histidine-Specific Protein–Ligand Interactions
Source: MDPI journal article supplement (doi:10.3390/ijms23042392), 2022-02-21
Supplement: s1 [file s1]

**Supplementary Table S1. Crystallography data collection and refinement statistics**

| <b>Parameters</b>              | <b>TPM1 (PDB code:7WO1)</b>                     |
|--------------------------------|-------------------------------------------------|
| X-ray Source                   | BL19U1                                          |
| Wavelength (Å)                 | 0.97915                                         |
| Space group                    | <i>P</i> 2 <sub>1</sub> 2 <sub>1</sub> 2        |
| Unit cell parameters (Å)       | <i>a</i> =45.0, <i>b</i> =62.4, <i>c</i> =104.6 |
| Resolution range (Å)           | 50.0-2.15 (2.20-2.15)*                          |
| Unique reflections             | 16,430 (419)                                    |
| Completeness (%)               | 97.0 (52.7)                                     |
| Redundancy                     | 7.1 (2.6)                                       |
| <i>I</i> /σ( <i>I</i> )        | 23.6 (2.3)                                      |
| <i>R</i> <sub>merge</sub> (%)  | 9.3 (33.9)                                      |
| <i>R</i> <sub>meas</sub> (%)   | 10.0 (41.2)                                     |
| <i>R</i> <sub>pim</sub> (%)    | 3.5 (22.8)                                      |
| <i>CC</i> <sub>1/2</sub>       | 0.998 (0.811)                                   |
| <b>Refinement statistics</b>   |                                                 |
| Resolution range (Å)           | 27.59-2.15 (2.23-2.15)                          |
| Reflections used in refinement | 16,392 (1,469)                                  |
| Reflections used for R-free    | 1,639 (147)                                     |
| <i>R</i> <sub>work</sub> (%)   | 17.7 (21.9)                                     |
| <i>R</i> <sub>free</sub> (%)   | 22.3 (24.7)                                     |
| Number of non-hydrogen atoms   | 2,538                                           |
| Protein                        | 2,367                                           |
| Solvent                        | 136                                             |
| Ligand                         | 35                                              |
| Average B-factors              | 29.8                                            |
| Protein                        | 29.3                                            |
| Solvent                        | 37.1                                            |
| Ligand                         | 35.0                                            |
| r.m.s. deviations              |                                                 |
| Bond lengths (Å)               | 0.002                                           |
| Bond angles (°)                | 0.45                                            |
| Ramachandran                   |                                                 |
| Favored (%)                    | 97.7                                            |
| Allowed (%)                    | 2.3                                             |
| Outliers (%)                   | 0.0                                             |

\*Numbers in the brackets are for the highest resolution shell.

| Parameters                     | TPM5 (PDB code: 7WO2)     |
|--------------------------------|---------------------------|
| X-ray Source                   | BL19U1                    |
| Wavelength (Å)                 | 0.97915                   |
| Space group                    | $P2_12_12$                |
| Unit cell parameters (Å)       | $a=45.0, b=62.9, c=106.4$ |
| Resolution range (Å)           | 50.0-1.96 (1.99-1.96)*    |
| Unique reflections             | 22,409 (1,579)            |
| Completeness (%)               | 100.0 (100.0)             |
| Redundancy                     | 10.5 (7.6)                |
| $I/\sigma(I)$                  | 53.7 (17.8)               |
| $R_{\text{merge}}$ (%)         | 9.1 (21.3)                |
| $R_{\text{meas}}$ (%)          | 9.6 (22.8)                |
| $R_{\text{pim}}$ (%)           | 2.9 (8.0)                 |
| $CC_{1/2}$                     | 0.998 (0.989)             |
| <b>Refinement statistics</b>   |                           |
| Resolution range (Å)           | 23.53-1.96 (2.03-1.96)    |
| Reflections used in refinement | 22,367 (2,175)            |
| Reflections used for R-free    | 1,190 (110)               |
| $R_{\text{work}}$ (%)          | 18.2 (18.4)               |
| $R_{\text{free}}$ (%)          | 21.8 (22.5)               |
| Number of non-hydrogen atoms   | 2,647                     |
| Protein                        | 2,329                     |
| Solvent                        | 284                       |
| Ligand                         | 34                        |
| Average B-factors              | 18.2                      |
| Protein                        | 17.1                      |
| Solvent                        | 27.0                      |
| Ligand                         | 18.3                      |
| r.m.s. deviations              |                           |
| Bond lengths (Å)               | 0.007                     |
| Bond angles (°)                | 1.0                       |
| Ramachandran                   |                           |
| Favored (%)                    | 98.0                      |
| Allowed (%)                    | 2.0                       |
| Outliers (%)                   | 0.0                       |

\*Numbers in the brackets are for the highest resolution shell.

| Parameters                     | TPM10 (PDB code: 7WO3)    |
|--------------------------------|---------------------------|
| X-ray Source                   | BL19U1                    |
| Wavelength (Å)                 | 0.97915                   |
| Space group                    | $P2_12_12$                |
| Unit cell parameters (Å)       | $a=45.2, b=62.9, c=105.0$ |
| Resolution range (Å)           | 50.0-2.01 (2.03-2.01)*    |
| Unique reflections             | 20,375 (947)              |
| Completeness (%)               | 98.3 (92.5)               |
| Redundancy                     | 7.4 (4.9)                 |
| $I/\sigma(I)$                  | 10.4 (1.6)                |
| $R_{\text{merge}}$ (%)         | 19.2 (98.8)               |
| $R_{\text{meas}}$ (%)          | 20.8 (109.7)              |
| $R_{\text{pim}}$ (%)           | 7.7 (45.7)                |
| $CC_{1/2}$                     | 0.991 (0.476)             |
| <b>Refinement statistics</b>   |                           |
| Resolution range (Å)           | 31.45-2.01 (2.08-2.01)    |
| Reflections used in refinement | 18,827 (1,360)            |
| Reflections used for R-free    | 922 (62)                  |
| $R_{\text{work}}$ (%)          | 19.6 (22.5)               |
| $R_{\text{free}}$ (%)          | 24.3 (29.6)               |
| Number of non-hydrogen atoms   | 2,511                     |
| Protein                        | 2,340                     |
| Solvent                        | 132                       |
| Ligand                         | 39                        |
| Average B-factors              | 29.0                      |
| Protein                        | 28.6                      |
| Solvent                        | 34.8                      |
| Ligand                         | 35.7                      |
| r.m.s. deviations              |                           |
| Bond lengths (Å)               | 0.007                     |
| Bond angles (°)                | 0.9                       |
| Ramachandran                   |                           |
| Favored (%)                    | 96.4                      |
| Allowed (%)                    | 3.7                       |
| Outliers (%)                   | 0.0                       |

\*Numbers in the brackets are for the highest resolution shell.

| Parameters                     | TPM16 (PDB code: 7WOH)                                             |
|--------------------------------|--------------------------------------------------------------------|
| X-ray Source                   | BL19U1                                                             |
| Wavelength (Å)                 | 0.97915                                                            |
| Space group                    | <i>P</i> 1                                                         |
| Unit cell parameters (Å)       | $a=51.8, b=63.2, c=63.1$<br>$\alpha=78.5, \beta=71.4, \gamma=71.5$ |
| Resolution range (Å)           | 19.85-1.72 (1.78-1.72)*                                            |
| Unique reflections             | 68,709 (5,575)                                                     |
| Completeness (%)               | 89.6 (72.7)                                                        |
| Redundancy                     | 3.6 (3.2)                                                          |
| $I/\sigma(I)$                  | 40.6 (2.9)                                                         |
| $R_{\text{merge}}$ (%)         | 2.4 (13.3)                                                         |
| $R_{\text{meas}}$ (%)          | 2.8 (15.7)                                                         |
| $R_{\text{pim}}$ (%)           | 1.4 (8.3)                                                          |
| $CC_{1/2}$                     | 1.000 (0.990)                                                      |
| <b>Refinement statistics</b>   |                                                                    |
| Resolution range (Å)           | 19.48-1.72 (1.78-1.72)                                             |
| Reflections used in refinement | 68,520 (6,011)                                                     |
| Reflections used for R-free    | 3,522 (277)                                                        |
| $R_{\text{work}}$ (%)          | 17.9 (22.2)                                                        |
| $R_{\text{free}}$ (%)          | 19.8 (29.0)                                                        |
| Number of non-hydrogen atoms   | 5,187                                                              |
| Protein                        | 4,680                                                              |
| Solvent                        | 425                                                                |
| Ligand                         | 82                                                                 |
| Average B-factors              | 34.5                                                               |
| Protein                        | 33.6                                                               |
| Solvent                        | 41.1                                                               |
| Ligand                         | 44.8                                                               |
| r.m.s. deviations              |                                                                    |
| Bond lengths (Å)               | 0.009                                                              |
| Bond angles (°)                | 1.2                                                                |
| Ramachandran                   |                                                                    |
| Favored (%)                    | 96.5                                                               |
| Allowed (%)                    | 3.5                                                                |
| Outliers (%)                   | 0.0                                                                |

\*Numbers in the brackets are for the highest resolution shell.

| Parameters                     | TPM19 (PDB code:7WOF)                                               |
|--------------------------------|---------------------------------------------------------------------|
| X-ray Source                   | BL19U1                                                              |
| Wavelength (Å)                 | 0.97915                                                             |
| Space group                    | C121                                                                |
| Unit cell parameters (Å)       | $a=97.4, b=79.5, c=51.7$<br>$\alpha=90.0, \beta=114.0, \gamma=90.0$ |
| Resolution range (Å)           | 19.88-1.72 (1.78-1.72)*                                             |
| Unique reflections             | 3,7643 (3,254)                                                      |
| Completeness (%)               | 96.5 (98.4)                                                         |
| Redundancy                     | 6.6 (5.6)                                                           |
| I/ $\sigma$ (I)                | 27.5 (5.4)                                                          |
| $R_{\text{merge}}$ (%)         | 3.5 (22.8)                                                          |
| $R_{\text{meas}}$ (%)          | 3.8 (25.1)                                                          |
| $R_{\text{pim}}$ (%)           | 1.4 (10.2)                                                          |
| $CC_{1/2}$                     | 0.999 (0.977)                                                       |
| <b>Refinement statistics</b>   |                                                                     |
| Resolution range (Å)           | 19.77-1.72 (1.78-1.72)                                              |
| Reflections used in refinement | 37,279 (3,434)                                                      |
| Reflections used for R-free    | 1,762 (162)                                                         |
| $R_{\text{work}}$ (%)          | 19.8 (26.3)                                                         |
| $R_{\text{free}}$ (%)          | 20.4 (29.6)                                                         |
| Number of non-hydrogen atoms   | 2,627                                                               |
| Protein                        | 2,340                                                               |
| Solvent                        | 257                                                                 |
| Ligand                         | 30                                                                  |
| Average B-factors              | 31.0                                                                |
| Protein                        | 30.4                                                                |
| Solvent                        | 35.2                                                                |
| Ligand                         | 34.6                                                                |
| r.m.s. deviations              |                                                                     |
| Bond lengths (Å)               | 0.007                                                               |
| Bond angles (°)                | 0.9                                                                 |
| Ramachandran                   |                                                                     |
| Favored (%)                    | 97.0                                                                |
| Allowed (%)                    | 3.0                                                                 |
| Outliers (%)                   | 0.0                                                                 |

\*Numbers in the brackets are for the highest resolution shell.

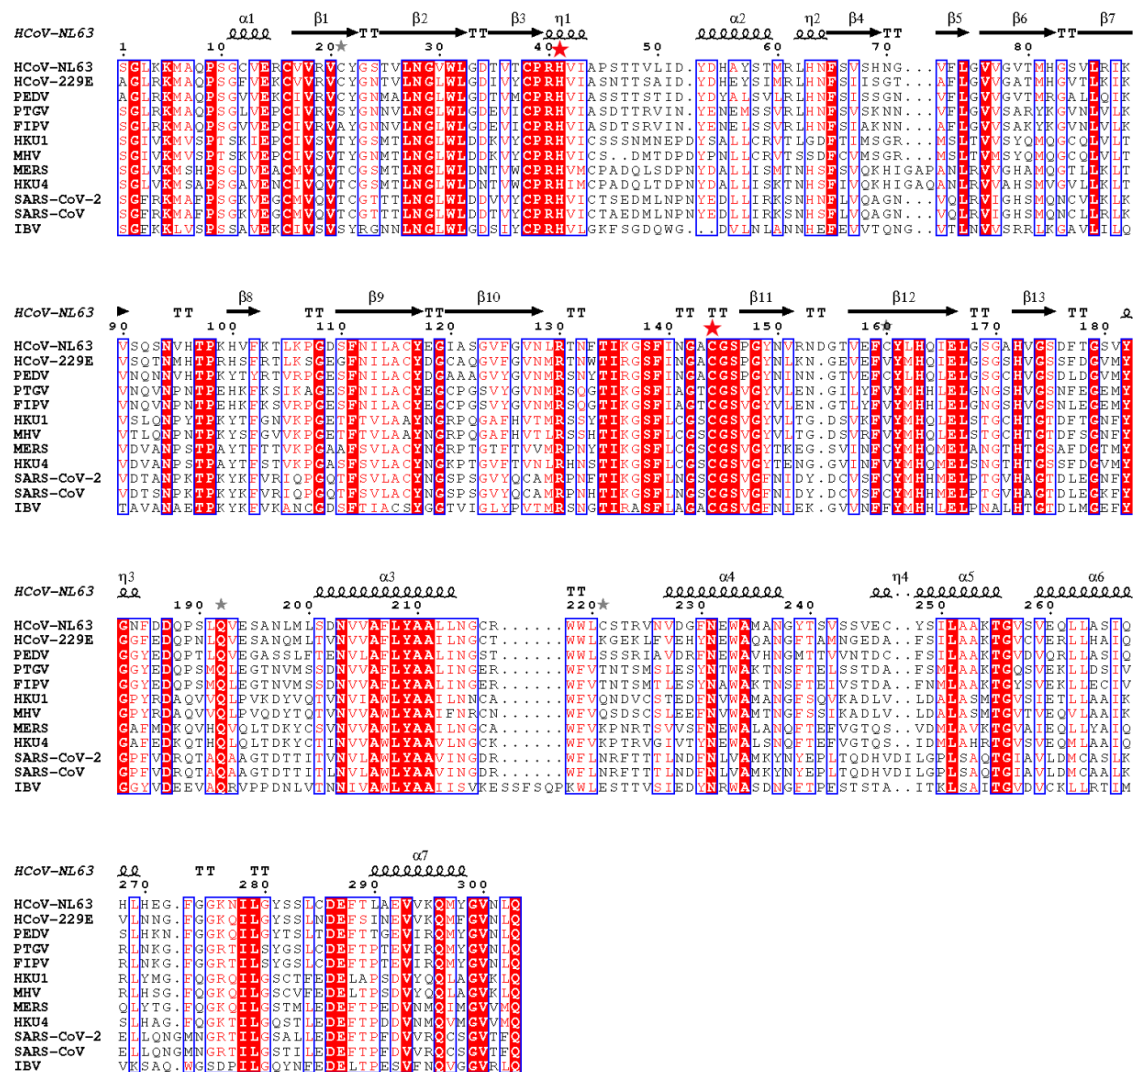

**Figure S1.** Multi-sequence alignment of 3CL<sup>Pro</sup> from twelve members of coronavirus family. Conserved residues were marked with blue frames and identical residues were highlighted in red. The H41 and C145 catalytic dyad was labeled with red stars on top of the column.

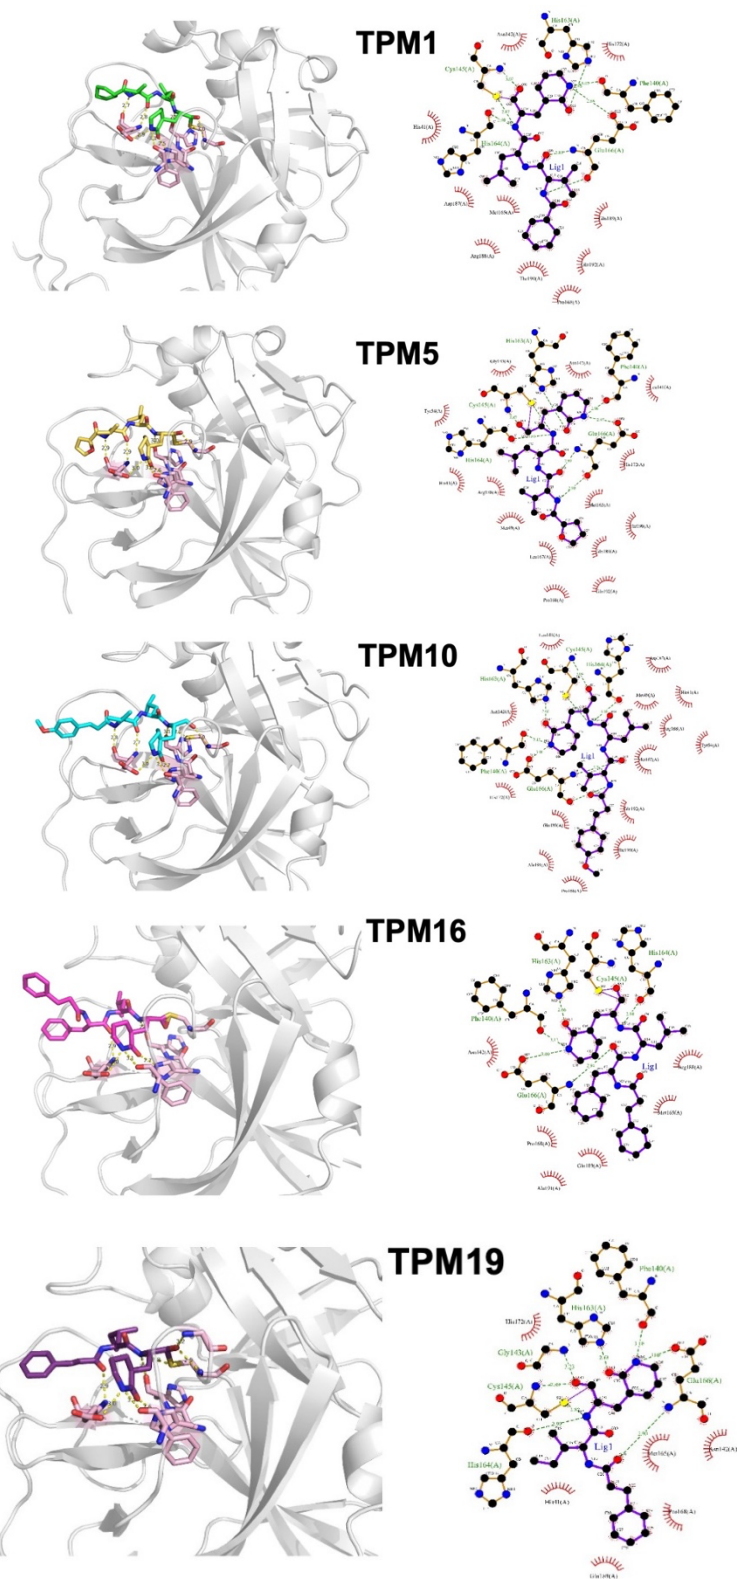

**Figure S2.** Key residues surrounding the TPM molecules were indicated as pink sticks.

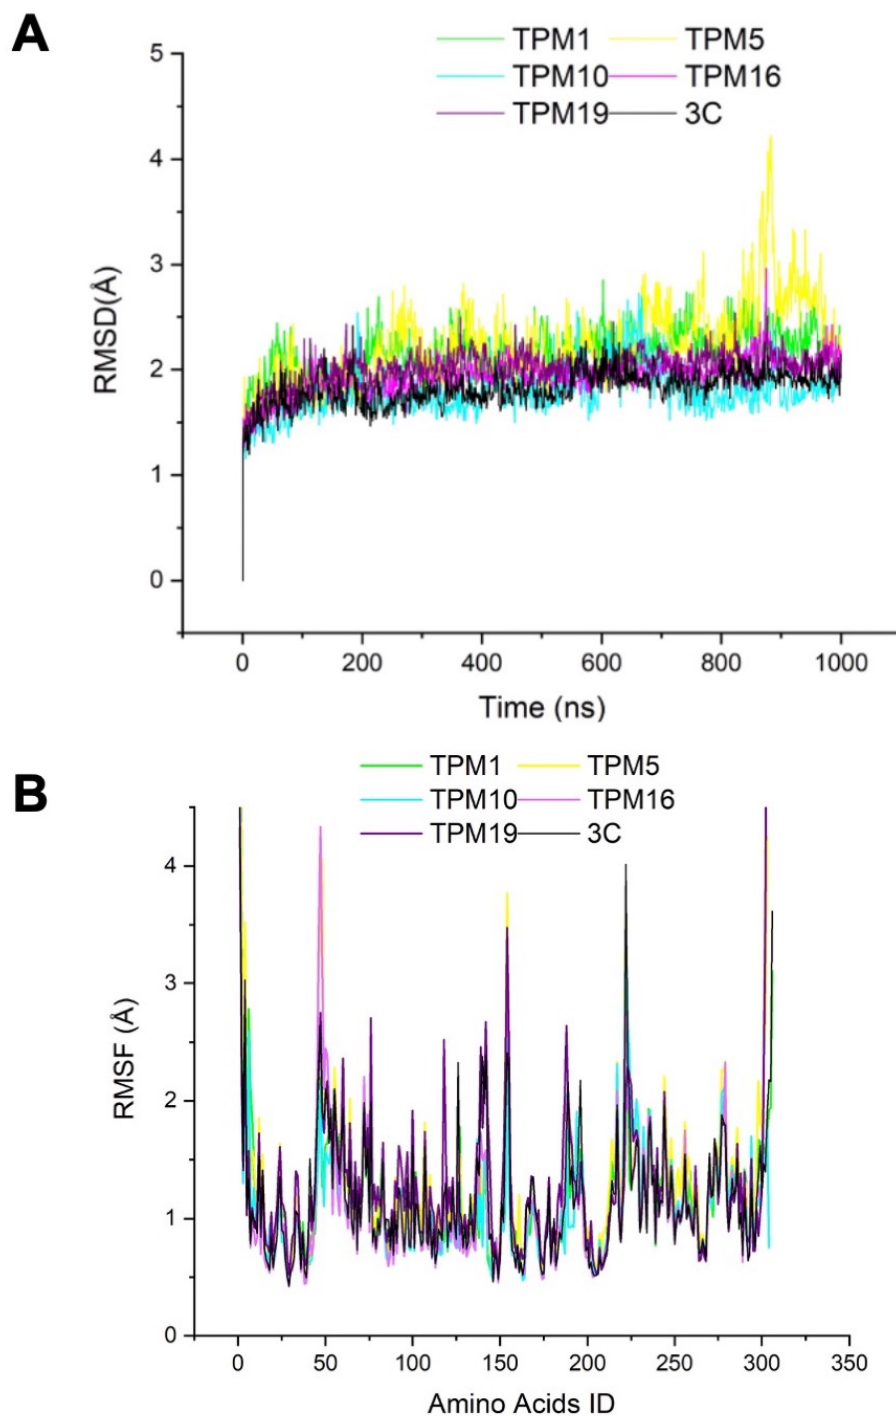

**Figure S3.** Kinetic parameters of the 3CL<sup>pro</sup> – TPM simulations. (A) The root-mean-square deviation (RMSD) of representative 100 ns trajectories. (B) The root mean square fluctuation (RMSF) measurements of the displacement of each residue in 3CL<sup>pro</sup>, related to Figure 5 of the main text.



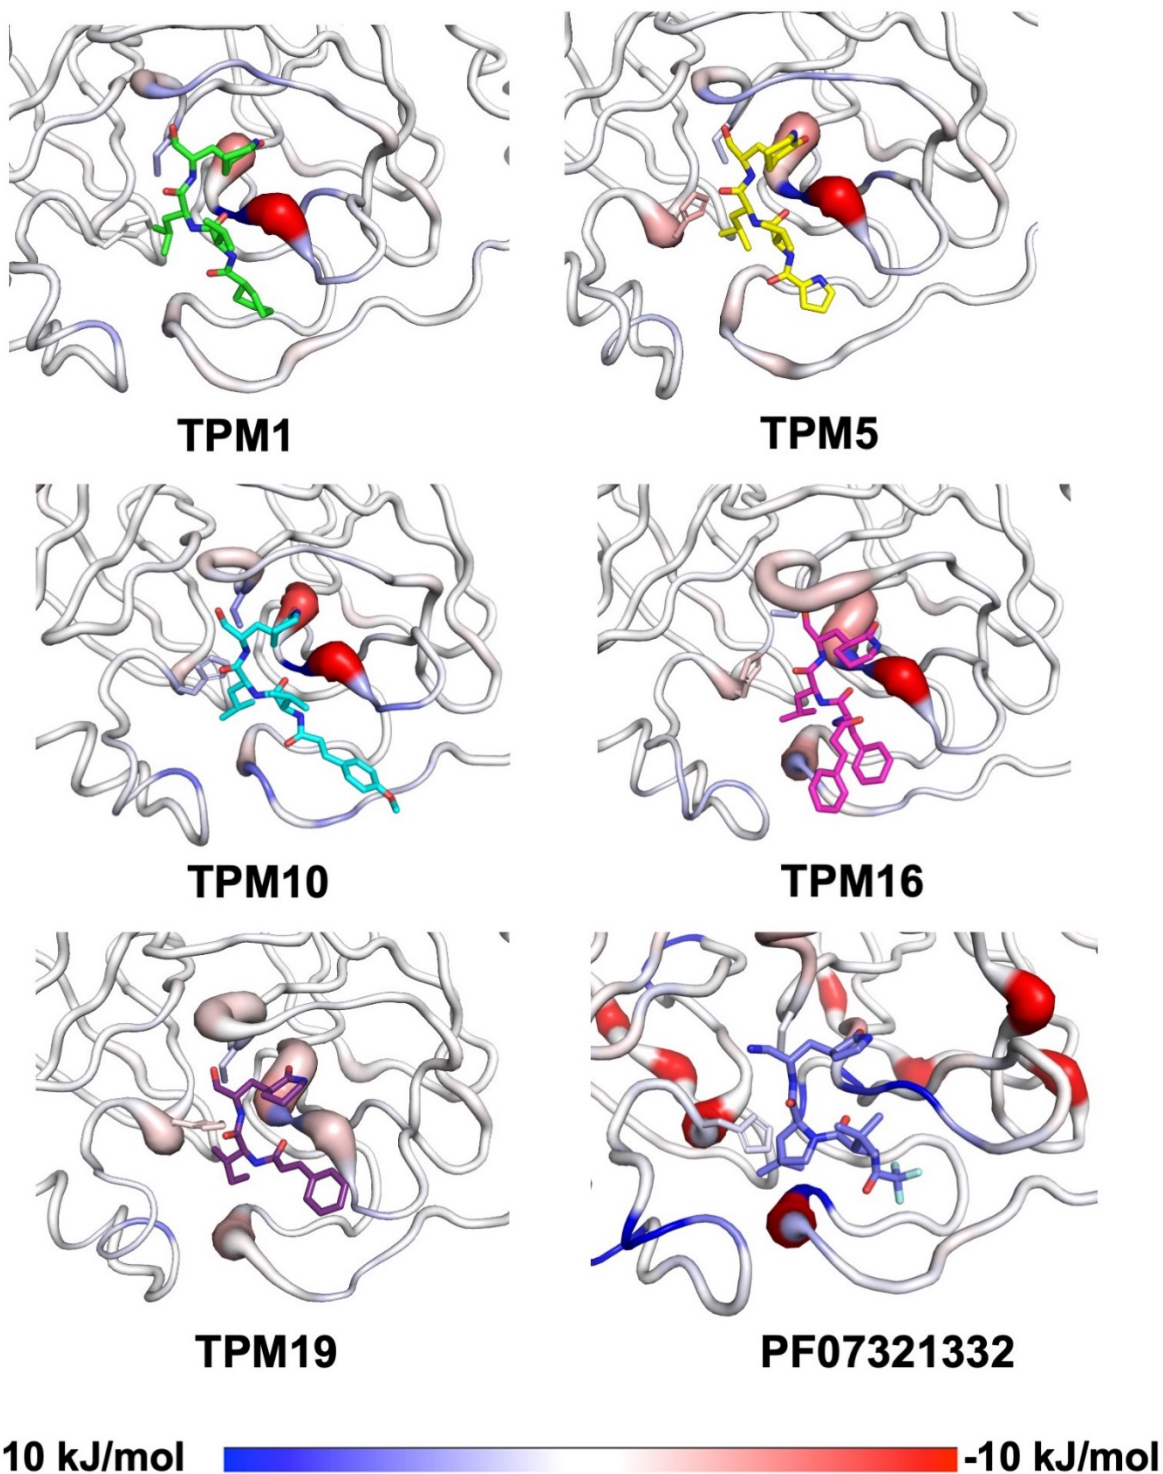

**Figure S4.** The interactions between 3CL<sup>pro</sup> inhibitors and H41. The catalytic dyad H41 and C145 residues were shown as sticks and colored by the magnitude of their interactions with each ligand, related to Figure 4 of the main text.

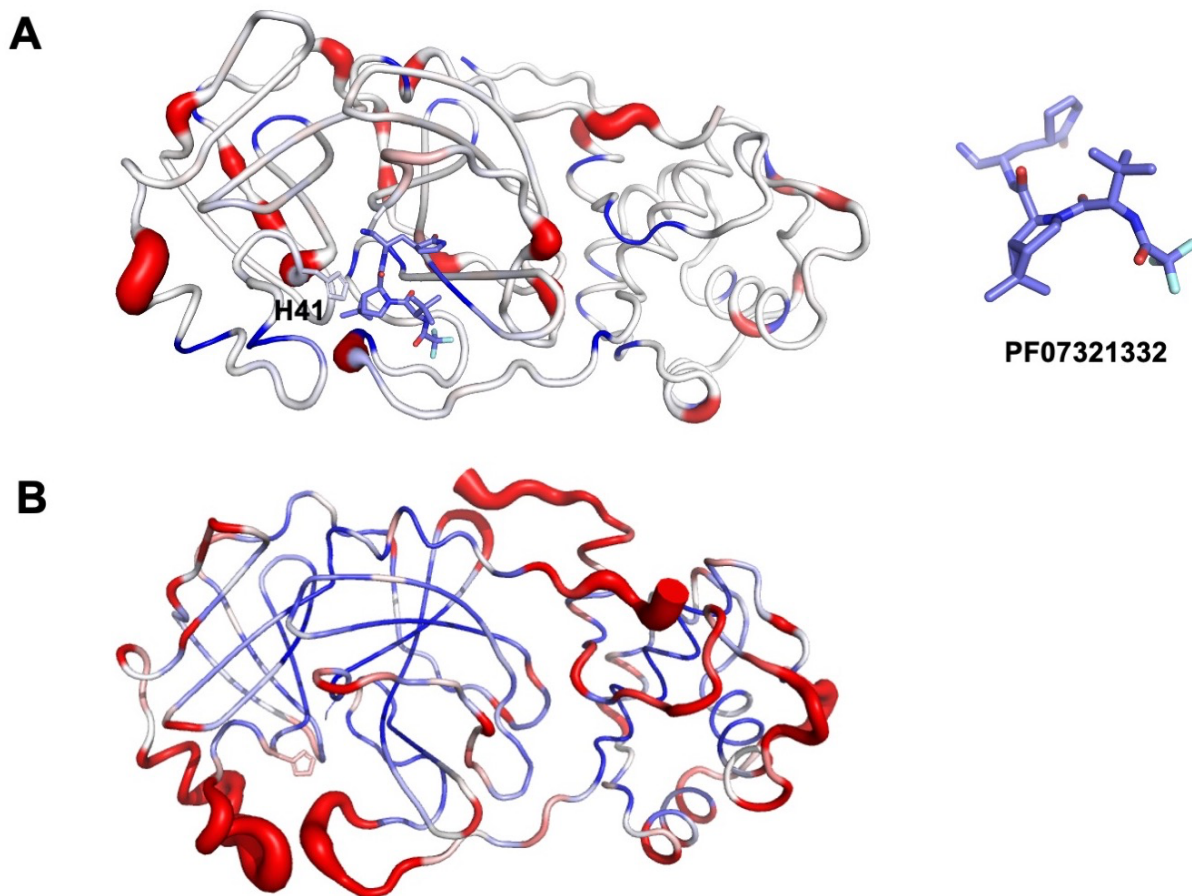

**Figure S5.** Simulations on the 3CL<sup>Pro</sup> – PF07321332 interactions. (A) The binding energies between PF07321332 and the 3CL<sup>Pro</sup> residues were illustrated with grey ( $\Delta G_{\text{bind}} \approx 0$ ), red ( $\Delta G_{\text{bind}} > 0$ ), blue ( $\Delta G_{\text{bind}} < 0$ ) colors. The H41 residue was illustrated as sticks and the  $\Delta G_{\text{bind}}$  of H41 to PF07321332 was -1.29 kJ/mol. Notably, the protein-ligand interactions of 3CL<sup>Pro</sup> – TPMs were largely confined to the reactive center (surrounding C145 and H41, Figure 4 in the main text), while the residue level interactions to PF07321332 were dispersed on the 3CL<sup>Pro</sup> scaffold, indicating PF07321332 induced stronger interactions not only in the binding pocket but also in remote regions. (B) Conformational plasticity of the 3CL<sup>Pro</sup> – PF07321332 complex. The H41 residue was illustrated as sticks and its red color indicated residue flexibility comparable to that of 3CL<sup>Pro</sup> – TPM19 (illustrated in Figure 5 of the main text).

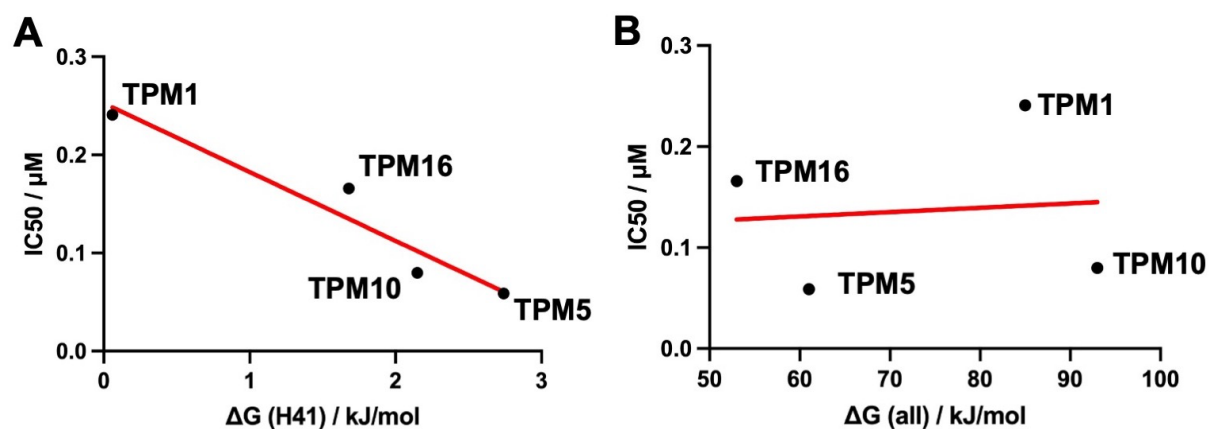

**Figure S6.** Fitting between experimentally measured  $IC_{50}$  and computationally predicted  $\Delta G_{bind}$ : (A) H41 residue – TPM interaction energies, (B) 3CLpro – TPM interaction energies. The data of tetrapeptidomimetic inhibitors were plotted and the X axis demonstrated absolute values of  $\Delta G_{bind}$  (kJ/mol).

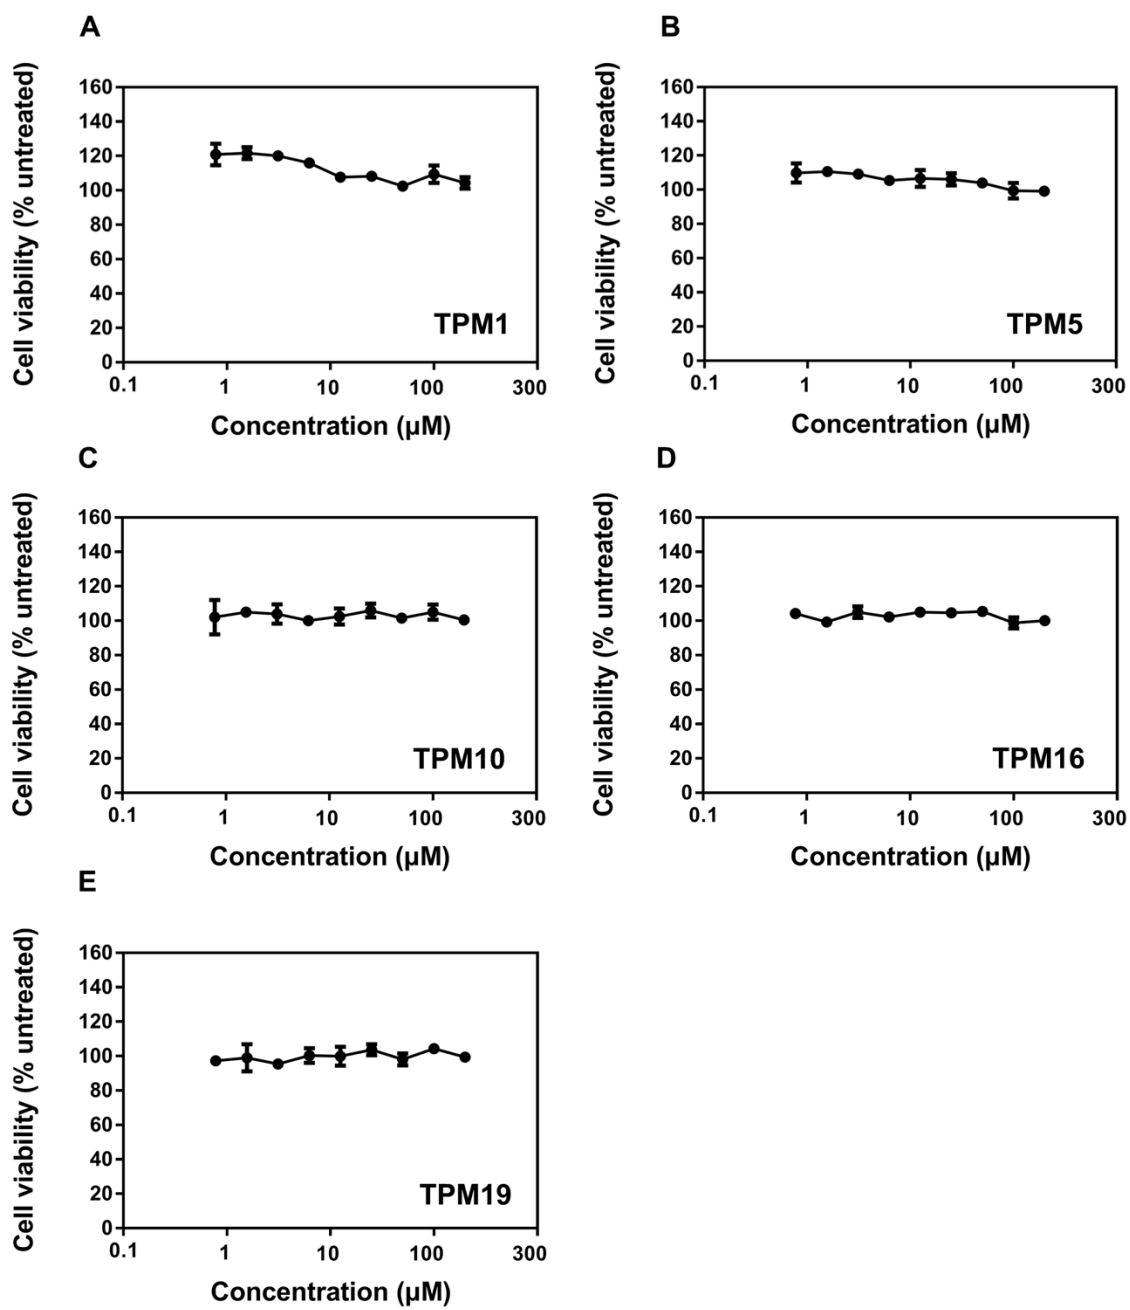

**Figure S7** The cell viabilities after TPM compounds treatment were measured by series dilution on Vero E6 cells.
